# Supplementary material for: Evolution of the Rdr1 TNL-cluster in roses and other Rosaceous species
Source: PubMed Central journal article supplement (PMC3503547; doi:10.1186/1471-2164-13-409), 2012-08-20
Supplement: 1471-2164-13-409-S1.pdf [file 1471-2164-13-409-S1.pdf]

*R. multiflora*

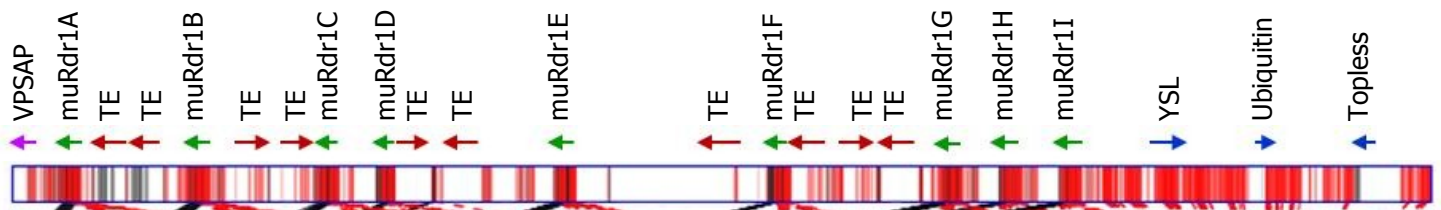

Strawberry, Chr7: 19,798,478-bp to 20,152,477-bp

**Additional file 1**
