# Supplementary material for: Evolution of the Rdr1 TNL-cluster in roses and other Rosaceous species
Source: PubMed Central journal article supplement (PMC3503547; doi:10.1186/1471-2164-13-409), 2012-08-20
Supplement: 1471-2164-13-409-S2.pdf [file 1471-2164-13-409-S2.pdf]

Peach, scf2: 26,050,000 bp to 26,110,000 bp

*R. multiflora*

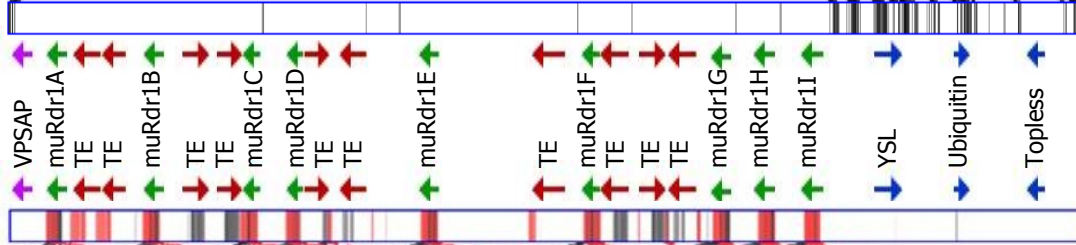

Peach, scf8: 2,050,000 bp to 2,510,000 bp

**Additional file 2**
