# Supplementary material for: Evolution of the Rdr1 TNL-cluster in roses and other Rosaceous species
Source: PubMed Central journal article supplement (PMC3503547; doi:10.1186/1471-2164-13-409), 2012-08-20
Supplement: 1471-2164-13-409-S3.pdf [file 1471-2164-13-409-S3.pdf]

Apple: chr1: 35,200,000 bp to 35,294,999 bp

*R. multiflora*

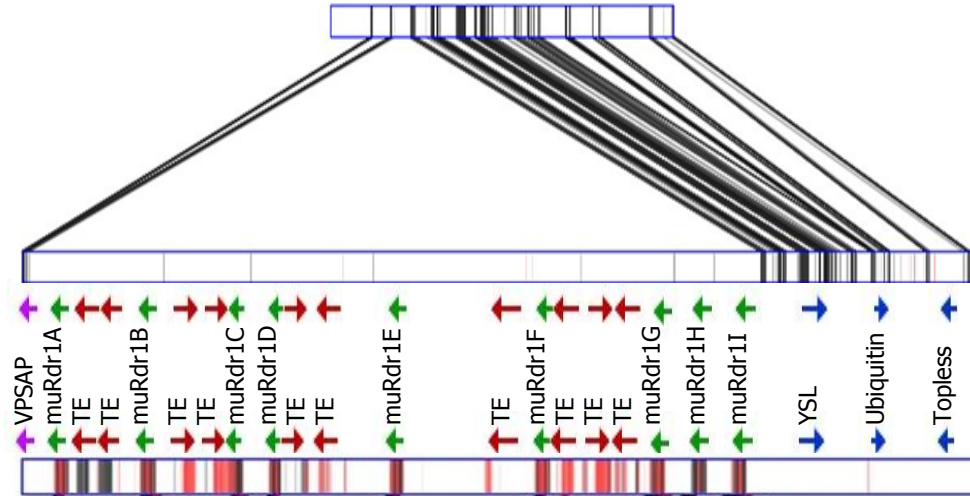

Apple: chr15:41,166,396 bp to 41,719,891 bp

**Additional file 3**
